# Supplementary material
Source: PubMed Central journal article supplement (PMC4880506)
Supplement: NIHMS778848-supplement-2.pdf [file NIHMS778848-supplement-2.pdf]

**Supplemental figure 1:**

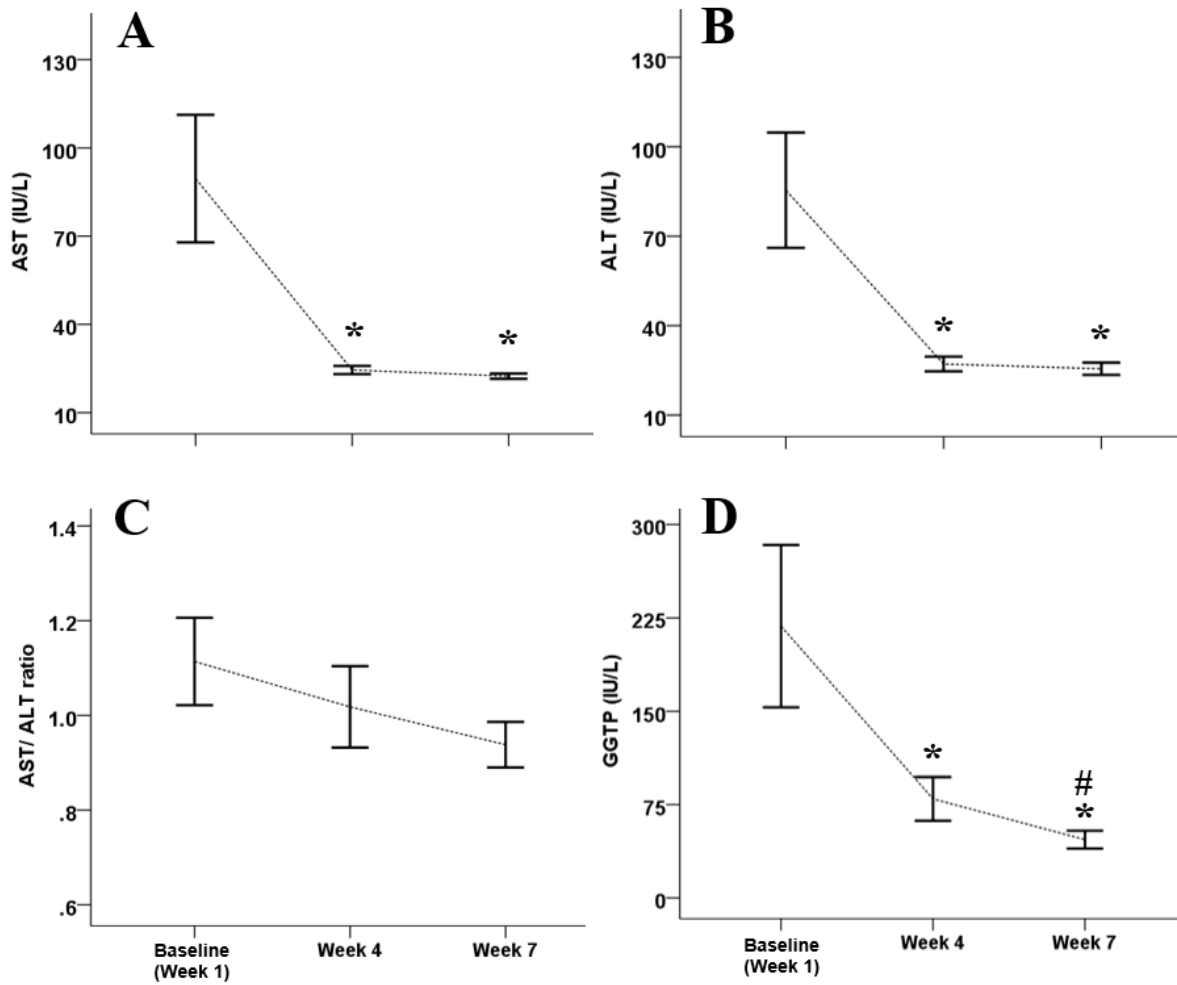

**Supplemental figure 1:** Biomarkers of liver function in the subsample (N=22). Individuals were assessed at three time points after cessation of alcohol baseline (week 1), week 4, and week 7. Shown are the mean ( $\pm$  SEM) for (A) plasma AST (IU/L); (B) plasma ALT (IU/L); (C) AST/ALT ratio; and (D) plasma GGTP (IU/L). \*:  $p < 0.05$  for the comparison with baseline. #:  $p < 0.05$  for the comparison with week 4.
